# Supplementary material for: Nonequilibrium solvation energy by means of constrained equilibrium thermodynamics and its application to self-exchange electron transfer reactions
Source: Royal Society of Chemistry journal article supplement (doi:10.1039/b908704d), 2009-12-18
Supplement: b908704d.pdf [file b908704d.pdf]

## SUPPORTING INFORMATION

### Appendix B. Electric potential due to the tessera itself

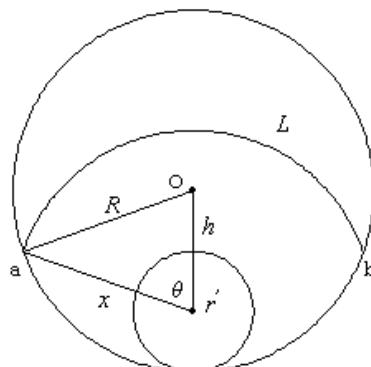

**Figure A1** A depiction of the electric potential at  $\mathbf{r}'$  within an circular disk  $R$ .

In this section we calculate the electric potential due to the surface element itself. The circular disk is depicted in Figure A1. Setting the circular disk with an area  $s$  and the radius  $R = \sqrt{s/\pi}$ . The surface charge  $q_i$  of tessera  $i$  can be approximately expressed as  $q_i = s \cdot \sigma$  where  $\sigma$  is the isodensity of surface charge. For the calculation of the electric potential at position  $\mathbf{r}'$ , with distance  $h$  from the origin, generated by the other continuous charges in the same tessera, the circular disk should be divided into two domains, the one is enveloped by the small solid circle with radius  $R-h$ , denoted by  $D_1$ , and the other is labeled by  $D_2$  which included all the circular disk except  $D_1$ . With the approximation of isodensity of surface charge, the potential contributed from  $D_1$  can be easily obtained, i.e.,

$$\int_0^{R-h} \frac{2\pi x \sigma}{x} dx = 2\pi(R-h)\sigma \quad (\text{B1})$$

where  $x$  is the distance to  $\mathbf{r}'$ . In order to integrate the potential produced by  $D_2$ , we should obtain firstly the length of arc  $L$  which is the segment of dashed circle with a radius  $x$  from  $a$  to  $b$  in a clockwise direction. Making use of the cosine theorem,  $x^2 + h^2 - 2xh \cos \theta = R^2$ , the length of arc  $L$  is given by

$$L = 2\theta x = 2x \text{Arccos} \left[ \frac{x^2 + h^2 - R^2}{2xh} \right] \quad (\text{B2})$$

Integrating on  $D_2$ , the result can be given as

$$\int_{R-h}^{R+h} \frac{\sigma L dx}{x} = \int_{R-h}^{R+h} 2\sigma \text{Arccos}\left[\frac{x^2 + h^2 - R^2}{2xh}\right] dx \quad (\text{B3})$$

Combing eqns (B1) and (B3), the electric potential at position  $\mathbf{r}'$  is given by

$$\varphi(\mathbf{r}') = \int_{R-h}^{R+h} 2\sigma \text{Arccos}\left[\frac{x^2 + h^2 - R^2}{2xh}\right] dx + 2\pi(R-h)\sigma \quad (\text{B4})$$

Equation (B4) can not be integrated analytically, but the numerical integration shows that the trend of  $\varphi(\mathbf{r}')$  varying with  $h$  exhibits a linear decrease property from  $h = 0$  to  $h = R$ . Therefore, it is reasonable to approximate  $\varphi(\mathbf{r}')$  with the linear interpolation method.

Application of eqn (B4) to the case of  $h = 0$ , the electric potential at the center of the tessera can be given as

$$\varphi(r_0') = 2\pi R\sigma = 2\sigma\sqrt{\pi s} \quad (\text{B5})$$

The formula is identical with the result deduced from circular convex. The potential at the edge of circular disk, for the case of  $h = R$ , equals to,

$$\varphi(R) = 4R\sigma = 4\sigma\sqrt{s/\pi} \quad (\text{B6})$$

Employing linear interpolation method,  $\varphi(h)$  with  $h$  being the distance to can be written as

$$\varphi(\mathbf{r}') = \left(2\sqrt{\pi s} + \frac{4\sqrt{s/\pi} - 2\sqrt{\pi s}}{R} h\right)\sigma \quad (\text{B7})$$

Combining the formulation  $\varphi(\mathbf{r}')$  with  $\sigma = q_i/s$  and integrating over  $\mathbf{r}'$ , we have

$$\int_i \frac{\sigma(\mathbf{r})\sigma(\mathbf{r}')}{|\mathbf{r}-\mathbf{r}'|} d\mathbf{r}d\mathbf{r}' = \int_i \varphi(\mathbf{r}')\sigma(\mathbf{r}') d\mathbf{r}' = \int_0^R \varphi(\mathbf{r}') 2\pi h \sigma dh = \frac{q_i^2}{\sqrt{s}} \left[ \frac{\sqrt{4\pi}}{3} + \frac{8}{3\sqrt{\pi}} \right] \quad (\text{B8})$$
